# Supplementary material for: Carriers for hydrophobic drug molecules: lipid-coated hollow mesoporous silica particles, and the influence of shape and size on encapsulation efficiency
Source: Royal Society of Chemistry journal article supplement (doi:10.1039/d4nr01420k), 2024-01-01
Supplement: d4nr01420k1.pdf [file d4nr01420k1.pdf]

# Carriers for Hydrophobic Drug Molecules: Lipid-Coated Hollow Mesoporous Silica Particles, and the Influence of Shape and Size on Encapsulation Efficiency

Sumiya Iqbal<sup>a</sup>, Tom-Jonas Klaus Huhle<sup>a</sup>, Thanh Truong<sup>c</sup>, Roman Ulrich-Müller<sup>b</sup>, Phuong-Hien

Nguyen<sup>c</sup>, Shaista Ilyas<sup>a\*</sup>, Sanjay Mathur<sup>a\*</sup>

<sup>a</sup> Institute of Inorganic Chemistry, University of Cologne, Greinstr. 6, 50939 Cologne, Germany

<sup>b</sup> Department II of Internal Medicine, University Hospital Cologne, Kerpener Str. 62, 50937 Cologne, Germany

<sup>c</sup> University of Cologne, Faculty of Medicine and University Hospital Cologne, Department I of Internal Medicine; Center for Molecular Medicine Cologne, Kerpener Str. 62 50937 Cologne, Germany

\*Correspondence: [sanjay.mathur@uni-koeln.de](mailto:sanjay.mathur@uni-koeln.de),

## Supplementary information:

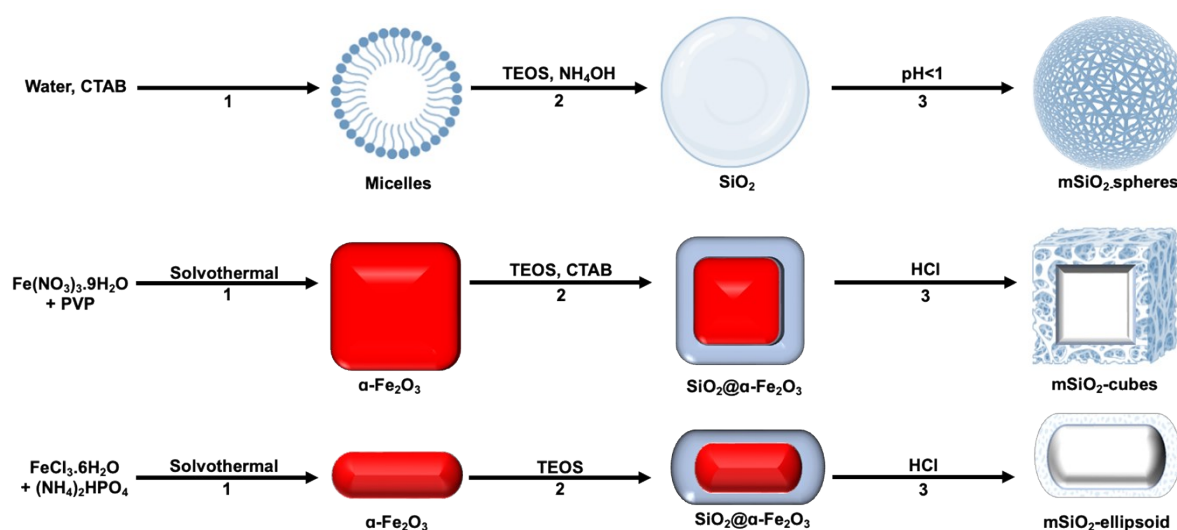

**Figure S1.** Schematic representation of mesoporous silica nanocarriers (spheres, cubes and capsules) designed using iron oxide NPs as hard templates and CTAB as a soft template. The modified Stöber synthesis method was

employed to coat silica onto these templates. Subsequently, the iron oxide core was selectively HCl etched to achieve the formation of hollow silica nanocarriers.

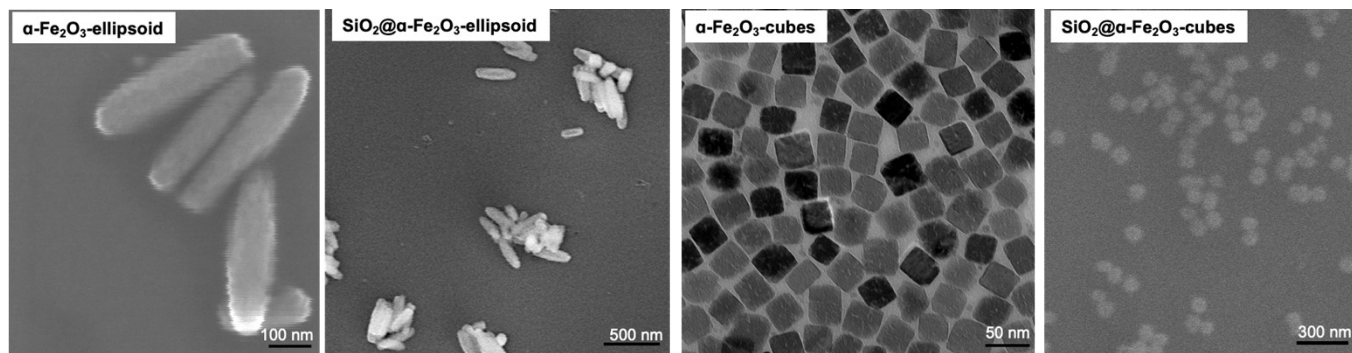

**Figure S2.** Morphological evaluation of iron core and core-shell nanoparticles by SEM. (A)  $\alpha$ -Fe<sub>2</sub>O<sub>3</sub>-ellipsoid. (B) core-shell SiO<sub>2</sub>@ $\alpha$ -Fe<sub>2</sub>O<sub>3</sub> ellipsoid. (C)  $\alpha$ -Fe<sub>2</sub>O<sub>3</sub>-cubes. (D) core-shell SiO<sub>2</sub>@ $\alpha$ -Fe<sub>2</sub>O<sub>3</sub> cubes.

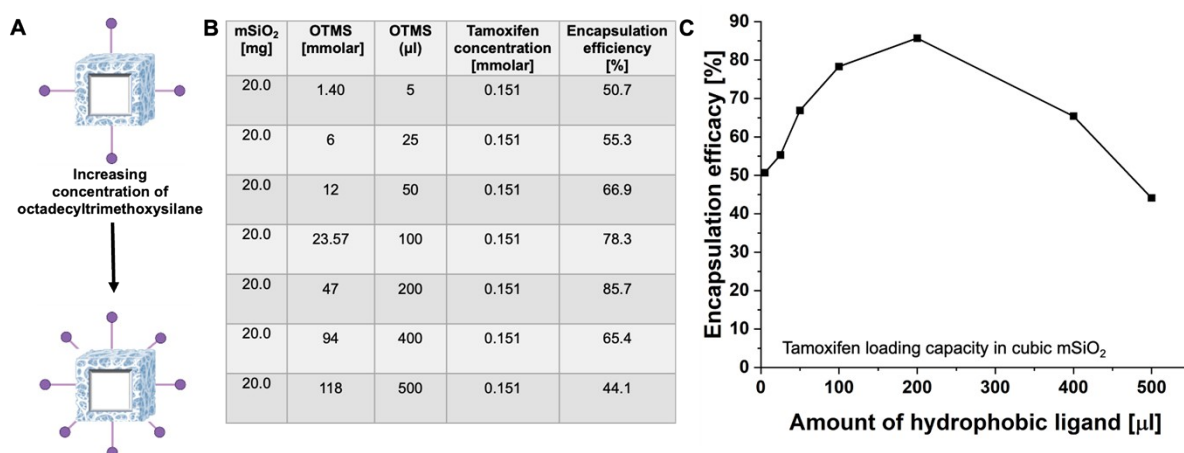

**Figure S3.** Determination of drug loading capacity with an increasing concentration of conjugated OTMS in mesoporous silica cubes.

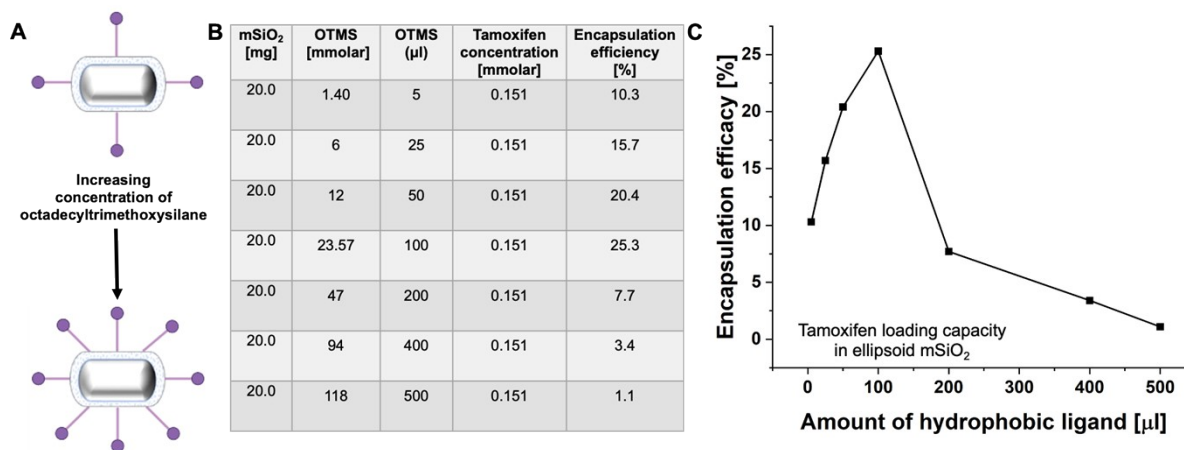

**Figure S4.** Determination of drug loading capacity with an increasing concentration of conjugated OTMS in mesoporous silica ellipsoid.

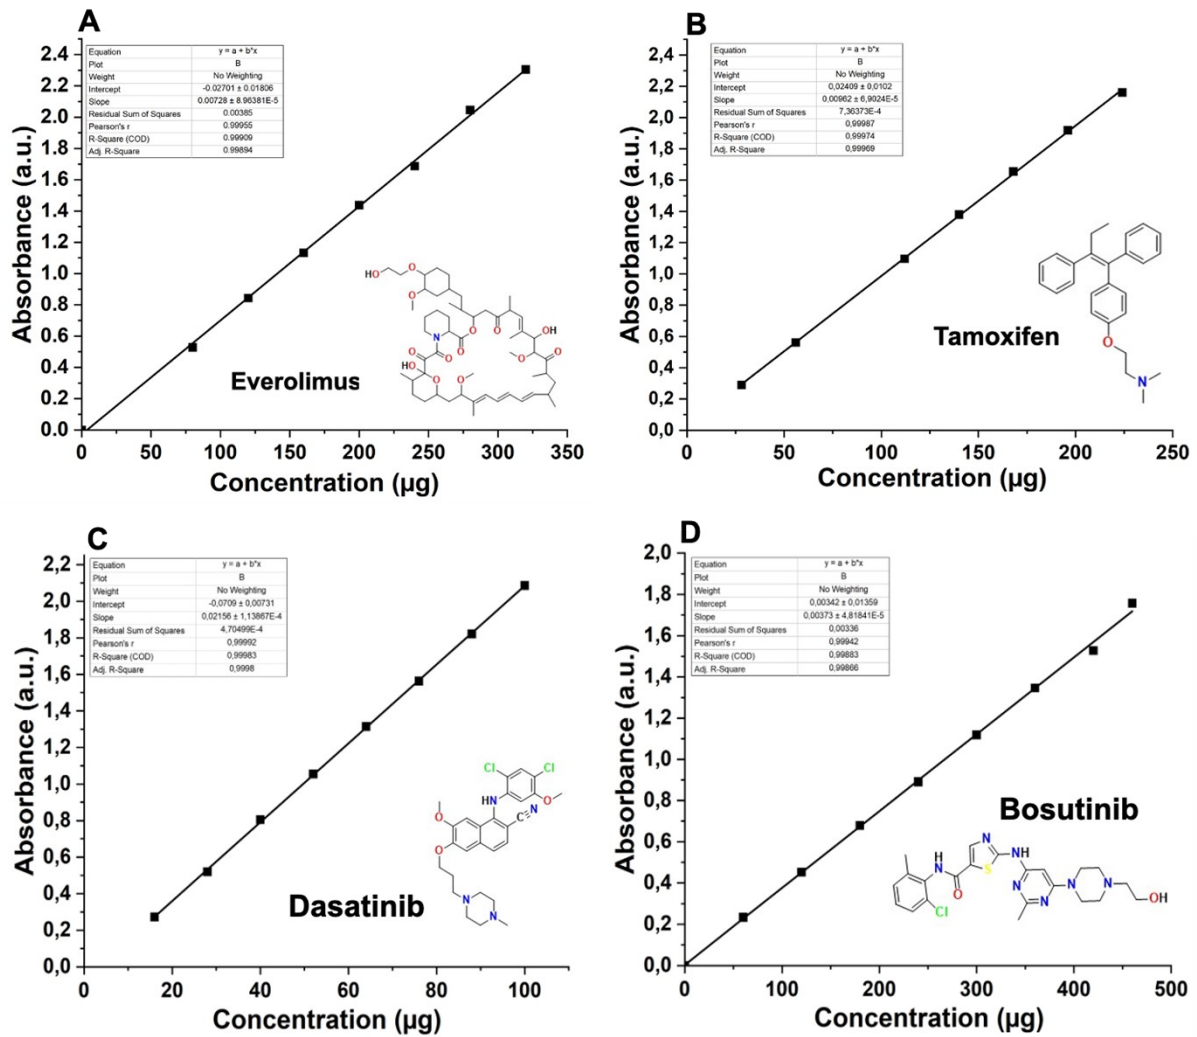

Figure S 5. Calibration curves: A) Everolimus B) Tamoxifen C) Dasatinib D) Bosutinib

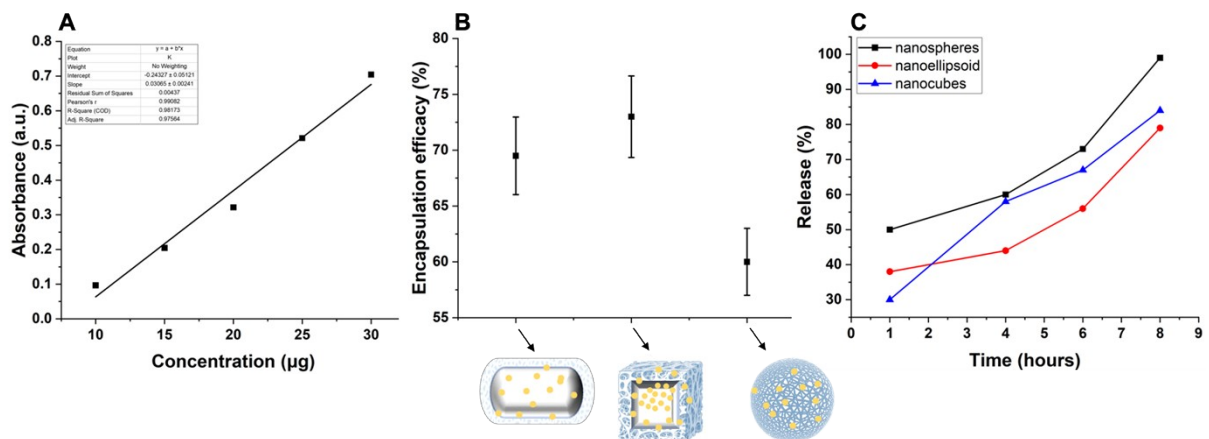

Figure S6. FITC encapsulation and release: A) Calibration curve for FITC. B) Encapsulation efficacy of all nanocarriers. C) FITC release from nanocarriers within 8 hours.
